# Supplementary material for: Lowe syndrome–linked endocytic adaptors direct membrane cycling kinetics with OCRL in Dictyostelium discoideum
Source: PubMed Central journal article supplement — Mol Biol Cell. 2019 Aug 1;30(17):2268–82. doi: 10.1091/mbc.E18-08-0510 (PMC6743453; doi:10.1091/mbc.e18-08-0510), 2019-08-01

# Supplemental Materials

*Molecular Biology of the Cell*

Luscher et al.

**Supplementary Figure 1, related to Figure 1.** Determination of candidate F&H proteins in humans by peptide array. **A)** Western Blot on three candidate proteins in HKC lysates showed no specific interaction with the OCRL F&H interface. **B)** ITC reveals the putative F&H peptide of Dynein heavy chain to be a non-specific interactor. **C)** Summary of tested human F&H peptides. Proteins labelled in red have been validated in previous publications. Proteins in yellow have been confirmed to be non-interactors of the OCRL-F&H motif by Isothermal Titration Calorimetry. Red residues are common to Ses1/2 and APPL1, blue residues are conserved in Ses proteins. Purple residues are at key positions and fall outside the Ses/APPL1 consensus. (MS= mass spectrometry on GFP-OCRL precipitates), WB (Western Blot) ITC (Isothermal titration calorimetry). + published in Swan et al PNAS 2010 and Pirruccello et al NSMB 2011; \* Nandez et al eLIFE 2014.

**Supplementary Figure 2, related to Figure 2.** Sequence conservation between Dd5P4 and human INPP5B and OCRL. Domains are indicated by lines under the sequence alignment. *Identical residues* are shaded. *Boxed residues*: interaction motifs for clathrin and AP2 (unique to OCRL). *Dot*: catalytic residue. *Arrowhead*: key Rab binding residue. *Starred residues*: mediate contact with F&H peptides. *Residues marked in red*: mutated in this study.

**Supplementary Figure 3, related to Figure 2:** Analysis of peptide enrichment of GFP immunoprecipitates from **A)** WT vs *Dd5P4*;GFP-Dd5P4<sup>WT</sup> and **B)** WT vs *Dd5P4*;GFP-Dd5P4<sup>W620A</sup> shows that putative F&H proteins (**Figure 2B**) are specifically enriched in precipitates from GFP-Dd5P4<sup>WT</sup> expressing cells.

**Supplementary Figure 4:** related to **Figures 3 and 4.** Sequences of PIO and GxcU proteins **A)** The predicted PH domains of *D discoideum* PIO (aa 543-741) and *D. purpureum* PIO partial sequence (aa 200-401). Identical residues are shaded. *Boxed region* was used to search crystal structures with Phyre2 **B)** Conservation of amino acid sequence between *D discoideum* and *D intermedium* GxcU genes. The Rho-GEF, PH and FYVE domains are strongly conserved, as is the F&H peptide sequence (boxed residues).

**Supplementary Figure 5, related to Figure 6:** GFP-Dd5P4<sup>W620A</sup> rescues many aspects of *Dd5P4* dysfunction. **A)** N-terminal and C-terminal GFP fusions of Dd5P4, and an N-terminal GFP labelled mutant of the F&H surface (W620A) all restore growth in a *Dd5P4* background. N=3 independent growth curves per genotype. **B)** Both GFP-Dd5P4 and GFP-Dd5P4<sup>W620A</sup> are largely cytosolic (as seen in previous publications), but GFP fluorescence is found on cytosolic organelles which are not part of the endocytic system (negative for 7KDa Dextran label). Arrowheads show GFP accumulation at collapsing contractile vacuole. **C)** Re-expression of GFP-tagged Dd5P4 restores osmotically-triggered CV fusion in cells labelled with FM4-64, N=3 independent movies per genotype, normalised to corresponding wildtype value. **D)** Lifetime of GFP-labelled CVs imaged at 0.2Hz *prior* to fusion in *Dd5P4*; GFP-Dd5P4<sup>WT</sup> cells is not significantly different to that of *Dd5P4*; GFP-Dd5P4<sup>W620A</sup> expressers: n= 28 GFP-Dd5P4<sup>WT</sup> labelled events, n=67 GFP-Dd5P4<sup>W620A</sup> labelled events, Student's t-test. All CV exocytosis events which were GFP positive either in the pre-collapse or collapse phase were analysed. The majority of GFP-Dd5P4<sup>WT</sup> CVs are positive for GFP only in the collapse phase (i.e are recorded as zero frames before CV collapse).

**Supplementary Movie 1, related to Figure 1:** Ruby-OCRL (red) and Frabin-GFP (green) are found together on pinosomal compartments in Cos7. Images 0.25Hz. Scale Bar 3µm.

**Supplementary Movie 2, related to Figure 4:** GxcU-GFP can be detected on phagosomes in WT cells. Images 0.25Hz. Scale Bar 15 $\mu$ m.

**Supplementary Movie 3, related to Figure 4:** GxcU-GFP can be detected on phagosomes in *Dd5P4* cells. Images 0.25Hz . Scale Bar 15 $\mu$ m.

**Supplementary Movie 4, related to Figure 5:** Recruitment of a C-terminal GFP fusion of OIBP (green). Contractile vacuoles are labelled by FM4-64 (red). Images 0.25Hz. Scale Bar 10 $\mu$ m.

**Supplementary Movie 5, related to Figure 6:** 1:1 dilution-of imaging medium with distilled water caused an increase CV exocytosis rate in WT. Images 0.2 Hz. Scale Bar 15 $\mu$ m.

**Supplementary Movie 6, related to Figure 6:** 1:1 dilution-of imaging medium with distilled water in *Dd5P4* mutants does not change CV exocytosis rate. Images 0.2 Hz. Scale Bar 15 $\mu$ m.

**Supplementary Movie 7, related to Figure 6:** the collapse/fusion phase of CV exocytosis in *Dd5P4* mutants re-expressing GFP-Dd5P4. Images 0.2Hz. Scale Bar 15 $\mu$ m.

**Supplementary Movie 8, related to Figure 6:** the collapse/fusion phase of CV exocytosis in *Dd5P4* mutants re-expressing F&H mutant GFP-Dd5P4<sup>W620A</sup>. Images 0.2Hz. Scale Bar 15 $\mu$ m.

A

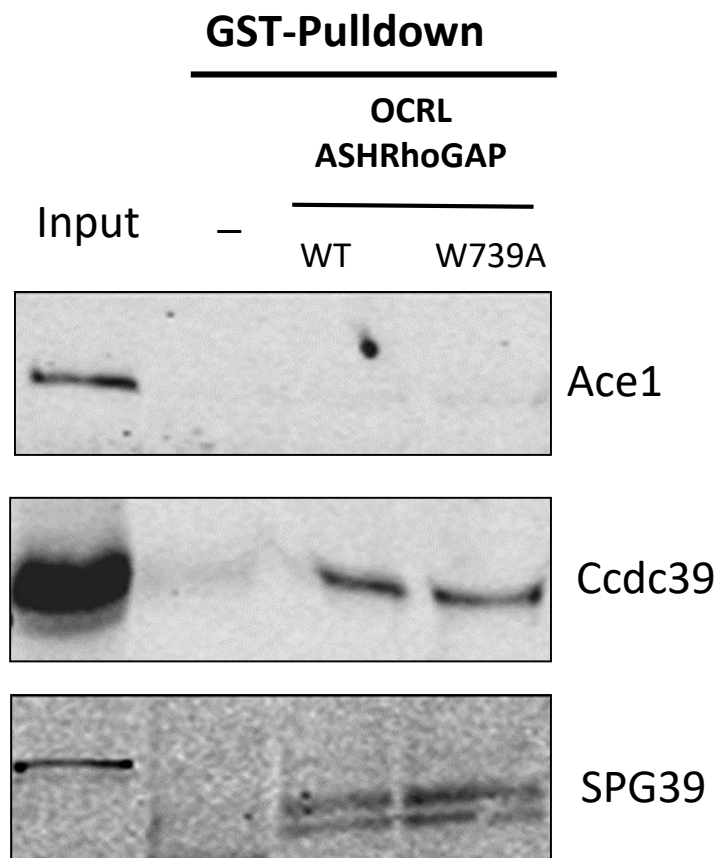

B

## Isothermal Titration Calorimetry OCRL ASH-RhoGAP

Dynein heavy chain:

K**F**RRQ**H**EQ**L**RA**V**I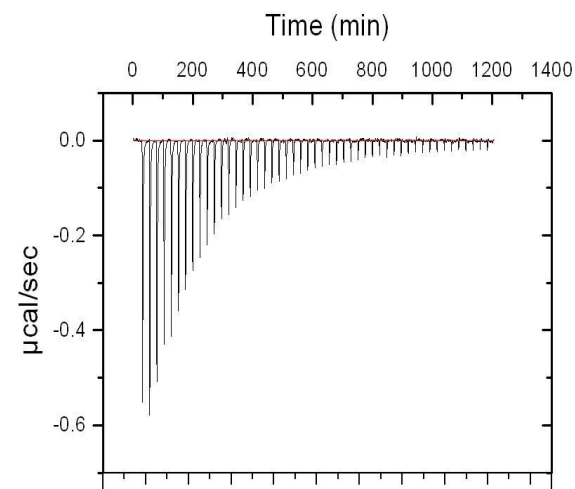

Dynein heavy chain mut.:

K**A**RRQ**H**EQ**L**RA**V**I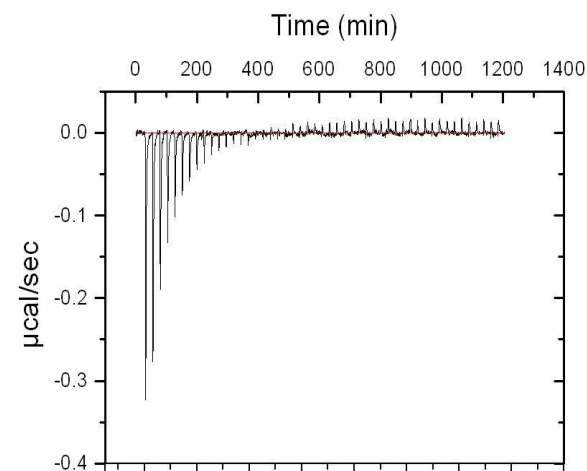

C

| Peptide                                                   | Protein            | M.S (*) | GST-PD | W.B      | Array    | ITC (+) |
|-----------------------------------------------------------|--------------------|---------|--------|----------|----------|---------|
| <b>Human proteins tested</b>                              |                    |         |        |          |          |         |
| CFSTLHDWYGQ <b>E</b> I                                    | <b>hSes2</b>       | Y       | Y      | Y (+)    | Y        | -       |
| PFARLHECYGQ <b>E</b> I                                    | <b>hSes1</b>       | Y       | Y      | Y (+)    | Y        | Y (+)   |
| SFQQRHESLYRP                                              | <b>hAPPL1</b>      | N       | Y      | Y (+)    | Y        | Y (+)   |
| AFHQRHET <b>F</b> R <b>N</b> A <b>I</b>                   | <b>Frabin</b>      | N       | Y      | Y        | Y        | -       |
| I <b>F</b> HLY <b>H</b> KK <b>T</b> LFY <b>S</b>          | FGD5               | N       | N      | -        | -        | -       |
| VFQLL <b>H</b> KN <b>M</b> LFY <b>V</b>                   | FGD6               | N       | N      | -        | -        | -       |
| DFIMMHCV <b>F</b> MP <b>N</b> T                           | SPG39              | N       | -      | <b>N</b> | <b>Y</b> | -       |
| L <b>F</b> SIR <b>H</b> RS <b>L</b> HR <b>H</b> S         | Ace1               | N       | -      | <b>N</b> | <b>Y</b> | -       |
| D <b>F</b> RKI <b>H</b> NER <b>R</b> Q <b>E</b> LI        | Ccdc39             | N       | -      | <b>N</b> | <b>Y</b> | -       |
| V <b>F</b> SQL <b>H</b> EL <b>R</b> QQ <b>D</b> L         | WDR81              | N       | -      | -        | <b>Y</b> | -       |
| R <b>F</b> RKL <b>H</b> CT <b>R</b> N <b>F</b> I <b>H</b> | PACR               | N       | -      | -        | <b>Y</b> | -       |
| K <b>F</b> RRQ <b>H</b> EQ <b>L</b> RA <b>V</b> I         | <b>Dynein.h.c</b>  | N       | -      | -        | N        | N       |
| P <b>F</b> ARL <b>A</b> ECY <b>G</b> Q <b>E</b> I         | <b>hSes1 (mut)</b> | -       | N (+)  | N (+)    | N        | N (+)   |
| <b>Dictyostelium proteins tested</b>                      |                    |         |        |          |          |         |
| D <b>F</b> SSQ <b>H</b> QQ <b>Y</b> S <b>F</b> D <b>Q</b> | <b>OIBP</b>        | Y       | Y      |          |          |         |
| D <b>F</b> LT <b>L</b> H <b>K</b> AY <b>I</b> DE <b>W</b> | <b>PIO</b>         | Y       | Y      |          |          |         |
| S <b>F</b> IAT <b>H</b> TAY <b>N</b> KN <b>E</b> N        | <b>GxcU (#2)</b>   | Y       | Y      |          |          |         |
| S <b>F</b> QL <b>I</b> H <b>P</b> IK <b>S</b> FT <b>L</b> | GxcU (#1)          | Y       | N      |          |          |         |
| G <b>F</b> VY <b>I</b> HC <b>N</b> L <b>G</b> LF <b>K</b> | Hwr (#1)           | Y       | N      |          |          |         |
| C <b>F</b> GT <b>T</b> H <b>F</b> CD <b>T</b> CH <b>D</b> | Hwr (#2)           | Y       | N      |          |          |         |

dd5p4 -----MGDIQNTDNIESNIDNNNNNNVLSLESS---SSSQ-----NNNTN 36  
 hINPP5B MDQSVAIQETLAEGEYCVIAVQGVLCGDSRQSRLLGLVRYRLEHGGQEHALFLYTHRRMAITGDDVSLDQIVFVSRDFT 80  
 hOCRL -----MEPPLPVGAQPLATVEGEMEMKGPLREPCALTLAQR----NGQ-YELIIQLHE-----KEQHVQDIIPINSHFR 63

dd5p4 -----TTTTTTTTSVDNLQVG----- 52  
 hINPP5B LEEVSPDGELYIILGSDVTVOLDTAELSLVFQLPFGSQTRMFLHEVARACPGFDSATRDPEFLWLSRYRCAELELEMPTR 160  
 hOCRL -----CVQEAETLIDIAFNS-----GCKIRVQGDWIR-----ERRFEIPDEE 102

dd5p4 ----VLS-----ISDQSTPT-----IET 66  
 hINPP5B GCNSALVTWPGYATIGGGRYPSRKKRWGLEEARPQGAGSVLFWGGAMEKTGFRLMERAHGGGFVWGRSARDGRRDEELE 240  
 hOCRL HCLKFLS----AVLAAQKAQS-----QLLVPEQKDSSSWYQKLDTKDKPSVFSGLLG-----FED 153

dd5p4 PNQQQQQQQDDNRRGVSNETIKASLDG-----LKHNSLKTTFP-----NST-----NHQY 111  
 hINPP5B AGREMSAAAGSRERNTAGGSNFDGLRPNKGVPMDQSSRGQDKPESLQPRQNKSKSEITDMVRSSTITVSDKAHILSMQK 320  
 hOCRL NFISMNLDKKINSQNPQTGIHREPPPP-----PFSVNKMLPREKEAS----NKEQPKVTNTMR-----KLFVPNTQS 216

dd5p4 IDVNTQWITNKLKERESEFTEKRGMSIFLGTWVNVGKKPSESLEDPWLKDPMSLQPDIIYAIGFQELDLTAEALLGDTR 191  
 hINPP5B FGLRDTIVKSHLLQKEEDYTYIQNFRFFAGTYNVNGQSPKECLRLWLSNGIQ--APDVYCVGFQELDLSKEAFFHDTPK 398  
 hOCRL -GQREGLIKHLAKREKEYVNIQTFRFFVGTWVNGOSPDGSLPWLNCDPN--PPDIYCIGFQELDLSTEAFFYFESVK 293

dd5p4 SLPWEQHILNTLQG--DYVKLLSKQLVGIILCVYVKEHKPHIANVQSDIAAVGIMGMMGNKGGVAIRFSFYNTTICILN 269  
 hINPP5B EEEWFKAVSEGLHPDAKYAKVKLIRLVGIMLLLVYKQEHAAIYSEVEAETVGTGIMGRMGNKGGVAIRFQFHNTSICVFN 478  
 hOCRL FOEWSMAVFERGLHSAKAKYKVVOLVRLVGMMLLI FARKDOCRYIRDIATETVGTGIMGKMGKGGVAVRFVFNITFCIVN 373

dd5p4 SHLNAHMDNVLRRNQDMKDISKNIKFINESSTDHSTINIFDHDQLFWIGDLNRYRIPLPD-NEVKEIKKKDFYNLFLVDQ 348  
 hINPP5B SHLAAHIEEYERRNQDYKDCSRMQFCQPDPS-LPPLTISNHDLVILWLDLNRYRIEELDVEKVKKLEEKDFQMLYAYDQ 557  
 hOCRL SHLAAHVDFEERBNQDYKDCARMSEVVPNOT-LPOLNIMKHEVVINLGDINRYRLCMPDANEVKSLLNKKDILORLLKFDQ 452

dd5p4 LNQQMKAGAVFEGFQEPPISEFAPTYKYDAGTEEYDSSEKKRTPAWCDRILWKTHKKAENVGILSYK-RAELISSDHRPVS 427  
 hINPP5B LKIQVAAKTVFEGFTEGELTFQPTYKYDTGSDDWDTSEKCRAPAWCDRILWK----GKNITQLSYQSHMALKTSDHKPVS 633  
 hOCRL LNIORTQKKAQVDFENEGEIKELPTKYKYSKTRDWDSSGKCRVPWAWCDRILWR----GTNVNQLNYSRSHMELKTSDBKPV 528

dd5p4 ASFVIKIKVVIIPDSKNRIYQEIIVKELDKKENDSMPDANISTNMVDFETIKFMQPIKQLIFENIGQVIARFQFIPKLD 507  
 hINPP5B SVFDIGVRVNDLYRKTLEEVRSLDKMNANIPSVLSKREFCFQNVKYMQLKVESFTIHN-GQVPCHFEPINKPDEE 712  
 hOCRL ALFHIGVKVWDERRYRKYFFEDSVRIMDRMENDFLPSLELSRREFVFNVKEROLQEKFOISNNGQVCHFSEIPKLNDS 608

dd5p4 ILCKPWLKISPLAGMMIPKEKVIDLTIYVDNLTSGLFNINNNSTNSTNESMDDILILHLENGKDYFISISGKFQKTCFG 587  
 hINPP5B SYCKQWLNANPSRGFLLPDSQDVEIDLELFFVNMKTATK-----NSGEDKIEDILVLHLDRGKDYFLSVSGNYLPSCFG 785  
 hOCRL QYCKPWLRAEPFEGYLEPNETVDISLDVYVSKDSVTIL-----NSGEDKIEDILVHLHLDRGKDYFLTSIGNYLPSCFG 681

dd5p4 NTLDNLVRYPHPIRNN-----LPIPEQKK-----LSIPKELWRIIDYIYNGLKEEGLFIKSG 641  
 hINPP5B SPIHTLCYMRPILDPLLETISELT-----LMPVWTGDDGSQDPSMEIPKELMMVDYLYRNAVQQEDLFFQPPG 855  
 hOCRL TSLEALCRMKRPIREVPVTHLIDLEEDSFELEKESLLOMVLDEG-ASERPLOVPKEIWLVDHLFKYACHOEFLFOTPG 760

dd5p4 VTKEMELIRDCLDTAEFFSSISFSIHSMAETLIRFLESILVEPVI PFNMYQQALDASSPLSCKTLVSHLPSVNYNVFFYL 721  
 hINPP5B LRSEFEHIRDCLDTGMIDN-LSASNHSVAEALLFLESLEPEVICYSTYHNCLECSGNYTASKQVISTLPIFHKNVFHYL 934  
 hOCRL MOEELQOIIIDCLDTSIPET-IPGSNHSVAEALLIFLEALPEPVICYELYORCLDSAYDPRICROVISOLPRCHRNVERYL 839

dd5p4 ISFLIETLSNQKENDLKPQLAII FSTVLLRPSQSQLSQFPDATTVKKKADLILHFLISKDLIN 787  
 hINPP5B MAFLRELLKNSAKNHLDENILASIFGSLLRNPAG----HQKLDMTEKKKAQEFIHQFLCNPL 993  
 hOCRL MAFLRELLKFSEYNSVNANMIATLETSLLRPPNPL---MAROTPSDRORAIQFLGFLGSEED 901

■ ■ ■ 5' Phosphatase    ■ ■ ■ ASH    ■ RhoGAP    □ Clathrin/AP2 binding    ☆ F&H surface

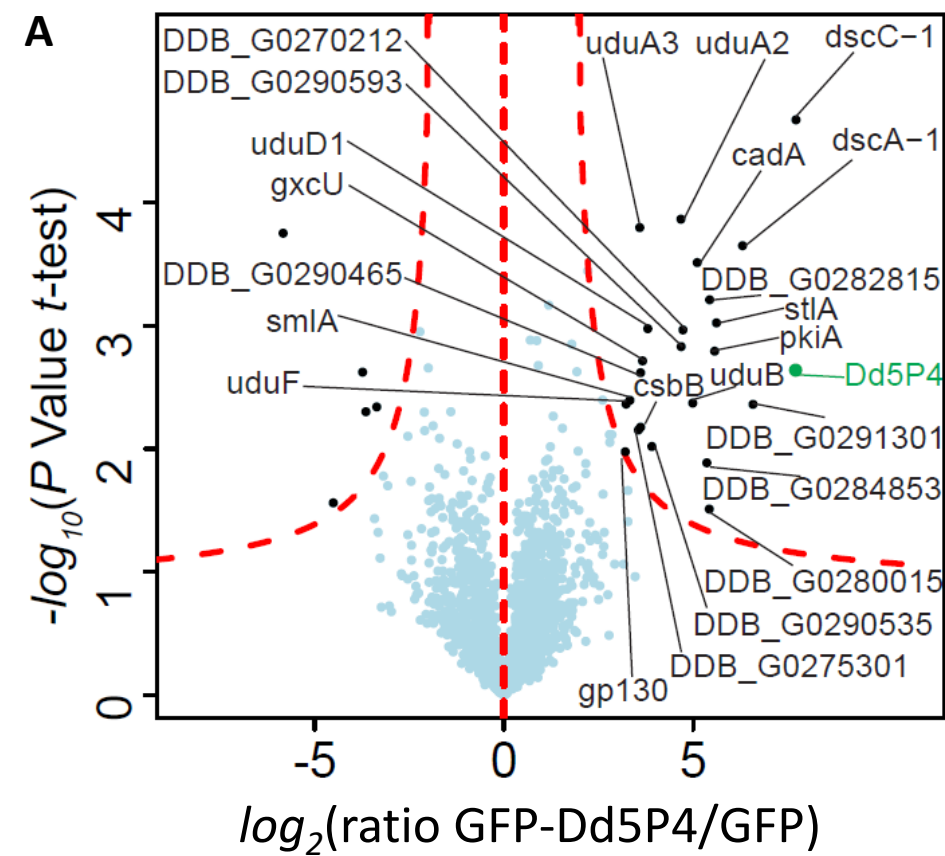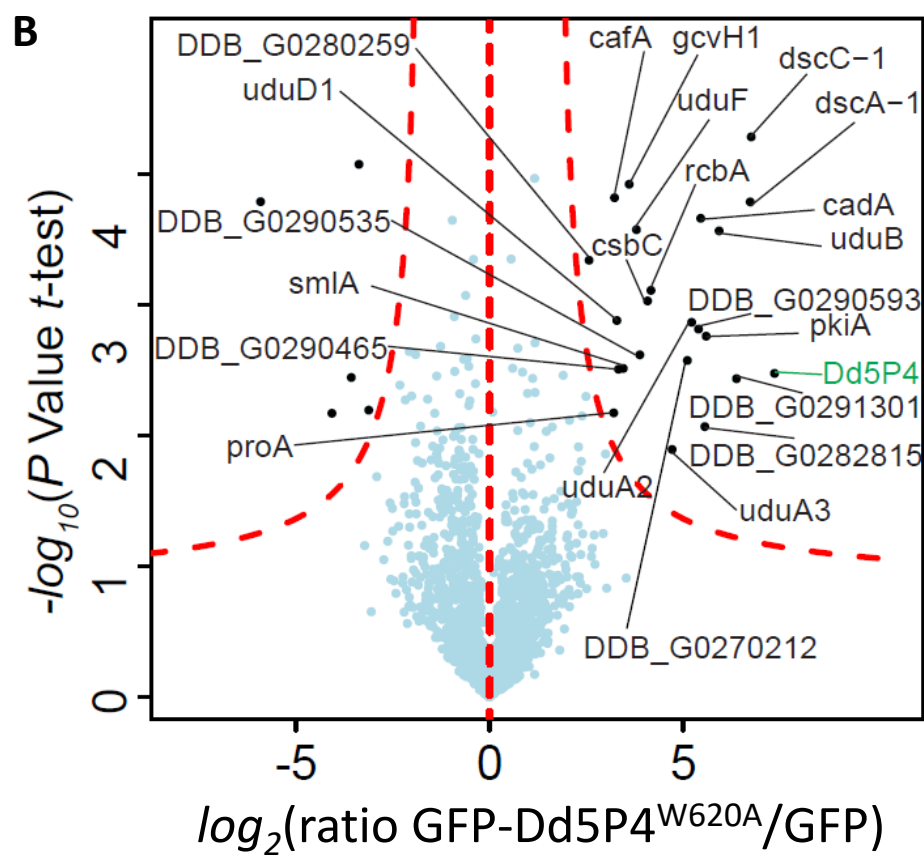

**A**

|        |    |                                                                                    |
|--------|----|------------------------------------------------------------------------------------|
| D. dic | PH | LIKQGWMKKRGTKNKSWKKRYFILDMKKTLLRYYKDNSK--IPHGNNSSNNSGGGSSSNNNNCNSGNNNNGLNGGSGKGDQV |
| D. pur | PH | LIKQGWMKKRGTKNKSWKKRYFILDMKKTLLRYYKDKSHHSVNGNNGNNSNCNGNGKNDQIVNNISSPINSNPHLSGST    |
|        |    |                                                                                    |
| D. dic | PH | NGNNISLPIGNNPHFHSSSGSGIHTTSPSMSS-SSTSLENNDILSSFDHLKYKGSIDLTYTSLVVAIKPSTFNVNINNSGS  |
| D. pur | PH | NNININPNNNNNNNNINNSIN--MINSISLSSNSSSSTSNLYENTSFENLRYKGSIDLTYTSLVVAIKPNTCNVNINNNVN  |
|        |    |                                                                                    |
| D. dic | PH | FKEDNNSYFGMDIITPSRTWNFCCESSKSMEDWLIVLKS--ANK                                       |
| D. pur | PH | IKEDNTQYFGMDIITPKRTWNLCCDSSKSMDEWLLALKSVQINK                                       |

**B**

|                    |                                                                                                              |     |
|--------------------|--------------------------------------------------------------------------------------------------------------|-----|
| D discoideum GxcU  | MDTKNKEILGSTIKAWIGRKRYKTMVNKTNRDKVAKEILDTEQIYVRNLETIVQ-FYKPLRNINPPLSPKSIQIIFGHIEDLLSLNTELLTSIQDRM            | 99  |
| D intermedium GxcU | MDTKNKEILGSTIKAWIGRKRYKGMVNKTNRDKVAKEILDTEQIYVRNLEFIVQVFYKPLRNINPPLSPKSIQIIFGHIEDLLSLNTELLTSIQDRM            | 100 |
|                    |                                                                                                              |     |
| D discoideum GxcU  | TTWYQDKRLGDIFTKMAPYLKVFTEYCGNYDKAVARLKQKSDSRDLQMFLKRVTSNSFGLDLNSSLVTPIQRIPRYKLLQSLIQLTPVEFSDYPTLA            | 199 |
| D intermedium GxcU | TTWYQDKRLGDIFTKMAPYLKVFTEYCGNYDKAVARLKQKSDSRDLQMFLKRVTSNSFGLDLNSSLVTPIQRIPRYKLLQSLIQLTPVEFSDYPTLT            | 200 |
|                    |                                                                                                              |     |
| D discoideum GxcU  | KALENVALVADHINESIREKQNSEKILTIQKRFTGQCPELLAPLRTFIREGSLTKVCRKDHKRWFILFSDALVYGNRIDTAVGNPIYKFHRLPLSNTK           | 299 |
| D intermedium GxcU | KALENVALVADHINESIREKQNSEKILTIQKRFTGQCPELLAPLRTFIREGSLTKVCRKDHKRWFILFSDALVYGNRIDTAVGNPIYKFHRLPLSNTK           | 300 |
|                    |                                                                                                              |     |
| D discoideum GxcU  | IANLDDTKHKNSFQLIHPIKSFTLIADTEQEKSWMNSFSDAQNFLLRNEGSVARMNKQYRSINILKPKKEETVSTAPVWIPDSEAIQCMECTIKFTTIR          | 399 |
| D intermedium GxcU | ISNLDDTEHKNSFQIIHPIKSFTLIADTEQEKLSSMNSFSDAQNFLLRNEGSVARMNKQY-TINILKQKEEEVSTAPVWVPDSEAIQCMECTIKFTTIR          | 399 |
|                    |                                                                                                              |     |
| D discoideum GxcU  | RRHCRCRCGNVVCVKGCSEQKWILDQYKDKARVCKTCYNYLSISSRSNENNVSNN-----LSTPTSTFTATTATATAPFGILT----DGASLADVSSD           | 490 |
| D intermedium GxcU | RRHCRCRCGNVVCVKGCSEQKWILDQYKDKARVCKTCYNYLSISASRSNENNNSNNNSANSLSPTTSTLTSTTTAATITSSITVTDISNASLADGSSD           | 499 |
|                    |                                                                                                              |     |
| D discoideum GxcU  | SEGEDNSSSINDSNPDMPIINGLSSIQIDNTPVILNTVNSPPLLSQPQPQPQPQLOPLQQPLQQPPPPQPNHKSFIATHAYNKENSLKSTSP                 | 590 |
| D intermedium GxcU | SEGEDNSS-INDSNPDMPIINGLSSIQIDNTPVILNTVNSPPLLSQOQQOQQOQQOQQOQQOQOQQOQQOQOQQOQQOQQOQQOQSVGHKSFATHAYNKENSLKSTSP | 597 |
|                    |                                                                                                              |     |
| D discoideum GxcU  | SSSFIETSTSTASSTSTSTSTSTSTSTSTSTSTSTSTSTSTSTSNSTSNSTLTPGPPMLSNSNAGNSLLDFCKSYIQNSPNVSPAKVEKHKHSSSSSSASNSPMQ    | 690 |
| D intermedium GxcU | SASFIEIP-----STSTSTPTATASTAITATTTTST-----TPPMLSNSNAGNSLLDFCKAYIQNSPSVSPAKVEKHKHSL---SASNSPMQ                 | 679 |
|                    |                                                                                                              |     |
| D discoideum GxcU  | SRTNLDIPS---TTTTSTKGSISPTQSSSIVLPELKPITHDPLVTSNNSSTLKVNQPIQHTNSSSKLNVIVSTPQITQTTENVMNTNTNTTTTNN              | 787 |
| D intermedium GxcU | SRSNLDIPSSTTTTTTTTTTGSISPNRSSESIVLPELKPITNDPLVTSNNSSTLKVNQPIQHTNSSSKLNV---LPQITQTLNS-----                    | 762 |
|                    |                                                                                                              |     |
| D discoideum GxcU  | NNNNNNNNNNNNNNNNNNNNNNNSDVSSPKPTTKSLPPTPPTKKLPPTPPPPLPPQPTLPQQPTLPQPNLPPQPNLPPQPNLPPQPNLPPQ                  | 887 |
| D intermedium GxcU | -----SNISNGNNSNNNNNDVSSPKPTTKSLPPTPPTKKLPPTPPPPLPPQPTLPQHPQ-----QLQQ                                         | 821 |
|                    |                                                                                                              |     |
| D discoideum GxcU  | QPDLSQPPPQQQQQPTLDQAPRPPKPNQDSRSQSFLCISSTVNSTPPTPPPKRISTHPANTSFIYQPPQYVSSPNINNVPPPLPPPRIKSAPIQRD             | 986 |
| D intermedium GxcU | PQQII---PQQQQQ--SDQAPRPPKPNQD-RSQSSNCISSTVNSTPPTPPPKRIVSSYPANTSFIYQPPQHVTSPTLNNVPPPLPPPRIKTSPIQRD            | 914 |

 **RhoGEF**       **PH**       **FYVE**



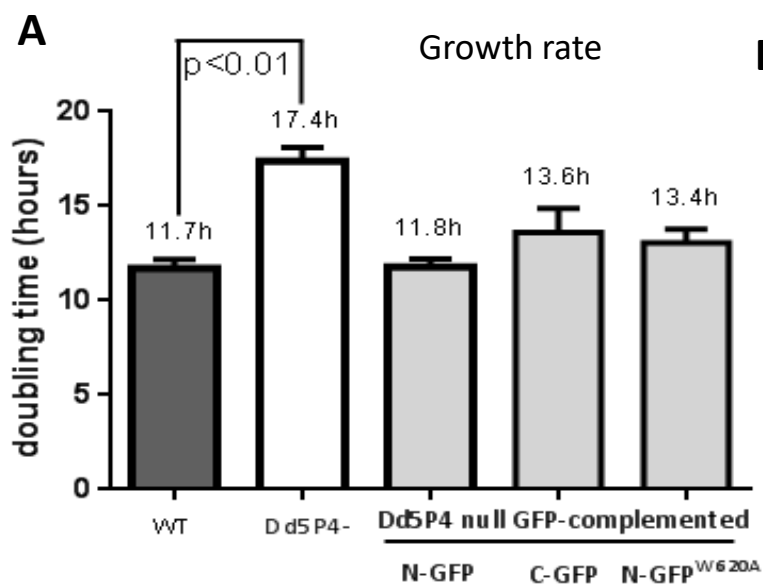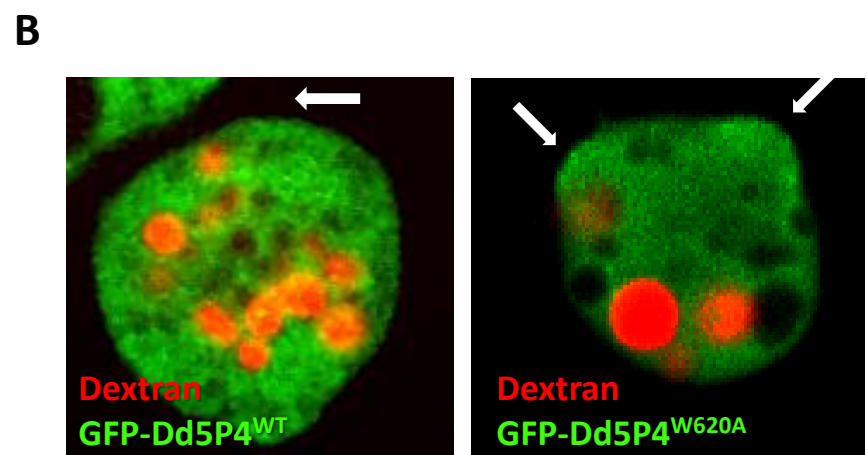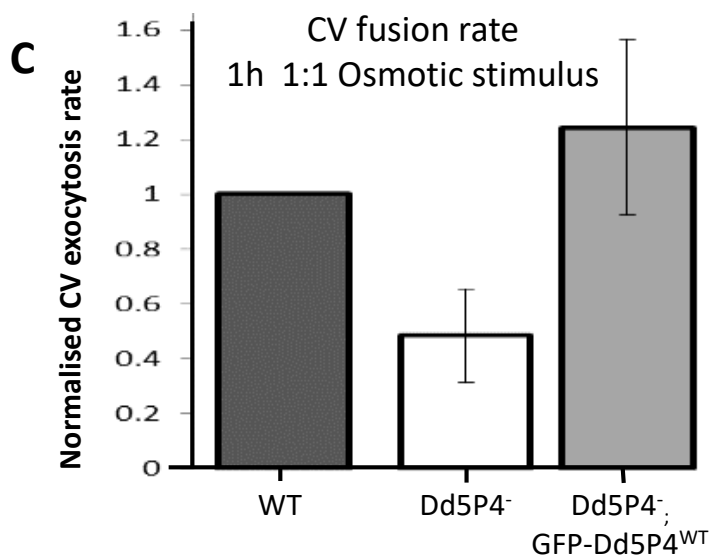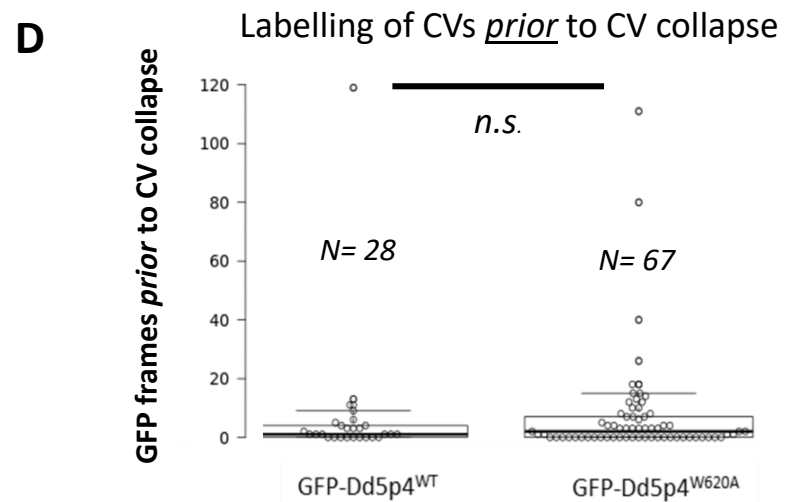

Supplement: mbc-30-2268-s001.pdf [file mbc-30-2268-s001.pdf]
